# Supplementary material for: First fossil mountain midges (Diptera, Deuterophlebiidae) and their evolutionary and ecological implication
Source: PubMed Central journal article supplement — Sci Rep. 2024 Oct 22;14:24864. doi: 10.1038/s41598-024-75389-y (PMC11496880; doi:10.1038/s41598-024-75389-y), 2024-10-22

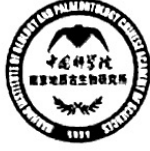

# 中国科学院南京地质古生物研究所

Nanjing Institute of Geology and Palaeontology, Chinese Academy of Sciences

## 标本说明函

本研究中涉及的缅甸琥珀昆虫标本(标本收集号 NIGP 177893, NIGP177894) 为中国科学院南京地质古生物研究所 (NIGP) 永久馆藏标本。该枚标本于 2015 年收集。标本的收集和入库过程符合研究所化石标本采购条例规定。该枚标本对其他研究者永久开放, 免费研究。

### Museum Catalogue Entry

The specimen (NIGP177893, NIGP177894) involved in this study were collected in 2015. These specimens are now deposited in the Nanjing Institute of Geology and Palaeontology, Chinese Academy of Sciences. The collection and storage process of these specimens were in full compliance with the regulations of fossils specimen procurement of the institute. Access is free to all scientists permanently.

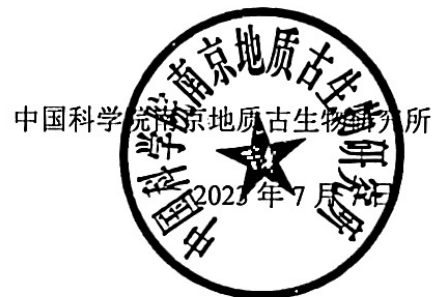

Supplement: 41598_2024_75389_MOESM1_ESM.pdf [file 41598_2024_75389_MOESM1_ESM.pdf]
